# Supplementary material for: Intermediate-Level Diet Quality of Brazilian Paralympic Athletes Based on National and International Indexes
Source: MDPI journal article supplement (doi:10.3390/nu15143163), 2023-07-17
Supplement: s1 [file s1]

## SUPPLEMENTARY MATERIALS

**Table S1: Scoring criteria of Brazilian Healthy Eating Index Revised (BHEI-R) components.**

| BHEI-R components                                                                                  | Scoring range | Minimum score       | Maximum score        |
|----------------------------------------------------------------------------------------------------|---------------|---------------------|----------------------|
| Total Fruit *                                                                                      | 0 to 5        | No consumption      | 1.0 serving/1000kcal |
| Whole Fruit                                                                                        | 0 to 5        | No consumption      | 0.5 serving/1000kcal |
| Total Vegetables                                                                                   | 0 to 5        | No consumption      | 1.0 serving/1000kcal |
| Dark Green and Orange Vegetables **                                                                | 0 to 5        | No consumption      | 0.5 serving/1000kcal |
| Total Grains                                                                                       | 0 to 5        | No consumption      | 2.0 serving/1000kcal |
| Whole Grains                                                                                       | 0 to 5        | No consumption      | 1.0 serving/1000kcal |
| Milk and Dairy Products                                                                            | 0 to 10       | No consumption      | 1.5 serving/1000kcal |
| Meat and Eggs **                                                                                   | 0 to 10       | No consumption      | 1.0 serving/1000kcal |
| Oils***                                                                                            | 0 to 10       | No consumption      | 0.5 serving/1000kcal |
| Saturated Fat                                                                                      | 0 to 10       | ≥ 15% of TEI        | ≤ 7% of TEI          |
| Sodium                                                                                             | 0 to 10       | ≥ 2.0 g/ 1.000 kcal | ≤ 0.75 g/ 1000 kcal  |
| SoFAAS                                                                                             | 0 to 20       | ≥ 35% of TEI        | ≤ 10% of TEI         |
| Total BHEI-R                                                                                       | 0 to 100      |                     |                      |
| Score: < 51 points “poor diet”, 51 to 80 points as “need modification”, > 80 points “healthy diet” |               |                     |                      |

\* Represent the consumption of fruits as natural Juice

\*\* Legumes added in this group

\*\*\* Include nuts and fish oil

TEI: Total Energy Intake; SoFAAS: solid fat, alcohol, and sugar added.

**Table S2: Food groups and scoring method for the GDQS, the GDQS+, and the GDQS -**

|             |        | GDQS components                |     |        | Scoring range (g/day) |      |      | Respective point values |   |   |
|-------------|--------|--------------------------------|-----|--------|-----------------------|------|------|-------------------------|---|---|
| Food Groups | GDQS + | Legumes                        | <9  | 9–42   | >42                   | 0    | 2    | 4                       |   |   |
|             |        | Nuts and seeds                 | <7  | 7–13   | >13                   | 0    | 2    | 4                       |   |   |
|             |        | Dark green leafy vegetables    | <13 | 13–37  | >37                   | 0    | 2    | 4                       |   |   |
|             |        | Whole Grains                   | <8  | 8–13   | >13                   | 0    | 1    | 2                       |   |   |
|             |        | Liquid oils                    | <2  | 2–7.5  | >7.5                  | 0    | 1    | 2                       |   |   |
|             |        | Fish                           | <14 | 14–71  | >71                   | 0    | 1    | 2                       |   |   |
|             |        | Deep orange fruits             | <25 | 25–113 | >113                  | 0    | 1    | 2                       |   |   |
|             |        | Citrus fruits                  | <24 | 24–69  | >69                   | 0    | 1    | 2                       |   |   |
|             |        | Other fruits                   | <27 | 27–107 | >107                  | 0    | 1    | 2                       |   |   |
|             |        | Low-fat dairy                  | <33 | 33–132 | >132                  | 0    | 1    | 2                       |   |   |
|             |        | Poultry                        | <16 | 16–44  | >44                   | 0    | 1    | 2                       |   |   |
|             |        | Eggs                           | <6  | 6–32   | >32                   | 0    | 1    | 2                       |   |   |
|             |        | Cruciferous vegetables         | <13 | 13–36  | >36                   | 0    | 0.25 | 0.5                     |   |   |
|             |        | Deep orange vegetables         | <9  | 9–36   | >36                   | 0    | 0.25 | 0.5                     |   |   |
|             |        | Deep orange tubers             | <12 | 12–63  | >63                   | 0    | 0.25 | 0.5                     |   |   |
|             |        | Other vegetables               | <23 | 23–114 | >114                  | 0    | 0.25 | 0.5                     |   |   |
|             | GDQS - | High-fat dairy                 | <35 | 35–142 | 142–734               | >734 | 0    | 1                       | 2 | 0 |
|             |        | Red meat                       | <9  | 9–46   | >46                   |      | 0    | 1                       | 0 |   |
|             |        | Juice                          | <36 | 36–144 | >144                  |      | 2    | 1                       | 0 |   |
|             |        | Processed Meat                 | <9  | 9–30   | >30                   |      | 2    | 1                       | 0 |   |
|             |        | White roots and tubers         | <27 | 27–107 | >107                  |      | 2    | 1                       | 0 |   |
|             |        | Refined grains and baked goods | <7  | 7–33   | >33                   |      | 2    | 1                       | 0 |   |
|             |        | Sugar-sweetened beverages      | <57 | 57–180 | >180                  |      | 2    | 1                       | 0 |   |
|             |        | Sweets and ice cream           | <13 | 13–37  | >37                   |      | 2    | 1                       | 0 |   |
|             |        | Fried foods that are purchased | <9  | 9–45   | >45                   |      | 2    | 1                       | 0 |   |

Score: < 15 points - low risk; 15 to 23 points - moderate risk and > 23 points - high risk of noncommunicable disease

Metric scoring approach: For each food group, a point value is assigned based on the observed range of consumption in grams per day. For example, legume consumption <9g /day is assigned 0 points, 9–42 g/day is assigned 2 points, and >42 g/day is assigned 4 points. Each food group is scored using three scoring ranges except for high-fat dairy, which uses four ranges. The GDQS is obtained by summing all food group point values, the GDQS+ is obtained by summing only the point values for the subset of food groups whose point values increase with increasing consumption, and the GDQS- is obtained by summing only the point values for the subset of foods groups whose point values decrease with increasing consumption or (in the case of two food groups, red meat, and high-fat dairy) increase and then decrease after a specific consumption threshold is met.

**Table S3: Descriptive scoring criteria of the usual intake and the first 24-hour recall of the Brazilian Healthy Eating Index Revised (BHEI-R) of 101 athletes with disabilities in Federal District/Brazil, 2018–2019**

| BHEI-R components                | Usual Intake/Rec1 | Median | IQR   | Minimum | Maximum | p     |
|----------------------------------|-------------------|--------|-------|---------|---------|-------|
| Total Fruit                      | Usual Intake      | 2,46   | 2,26  | 0,37    | 4,32    | 0,03  |
|                                  | Rec1              | 1,16   | 5,00  | 0,00    | 5,00    |       |
| Whole Fruit                      | Usual Intake      | 2,20   | 2,40  | 0,35    | 4,14    | 0,04  |
|                                  | Rec1              | 0,00   | 4,09  | 0,00    | 5,00    |       |
| Total vegetables                 | Usual Intake      | 4,79   | 0,15  | 3,12    | 4,79    | 0,001 |
|                                  | Rec1              | 5,00   | 0,00  | 0,00    | 5,00    |       |
| Dark green and orange vegetables | Usual Intake      | 4,76   | 0,61  | 2,34    | 4,76    | 0,005 |
|                                  | Rec1              | 5,00   | 0,00  | 0,00    | 5,00    |       |
| Total grains                     | Usual Intake      | 4,05   | 0,65  | 2,52    | 4,65    |       |
|                                  | Rec1              | 4,14   | 1,84  | 0,00    | 5,00    |       |
| Whole grains                     | Usual Intake      | 0,07   | 0,93  | 0,01    | 3,41    |       |
|                                  | Rec1              | 0,00   | 0,97  | 0,00    | 5,00    |       |
| Milk and dairy products          | Usual Intake      | 3,64   | 3,37  | 0,32    | 8,47    |       |
|                                  | Rec1              | 2,62   | 5,61  | 0,00    | 10,00   |       |
| Meat and eggs                    | Usual Intake      | 9,73   | 0,24  | 7,80    | 9,73    | 0,001 |
|                                  | Rec1              | 10,00  | 0,00  | 0,22    | 10,00   |       |
| Oils                             | Usual Intake      | 9,67   | 0,44  | 5,08    | 9,67    | 0,001 |
|                                  | Rec1              | 10,00  | 0,00  | 0,00    | 10,00   |       |
| Saturated fat                    | Usual Intake      | 6,10   | 2,19  | 2,70    | 8,38    |       |
|                                  | Rec1              | 7,15   | 6,32  | 0,00    | 10,00   |       |
| Sodium                           | Usual Intake      | 3,55   | 1,66  | 1,05    | 5,74    |       |
|                                  | Rec1              | 3,15   | 4,68  | 0,00    | 10,00   |       |
| SoFAAS                           | Usual Intake      | 10,35  | 5,79  | 1,58    | 18,00   | 0,01  |
|                                  | Rec1              | 10,67  | 12,22 | 0,00    | 20,00   |       |

SD = Standard Deviation; Rec1 = First 24-hour recall; Usual Intake = Calculation usual intake in software MSM with all 24-hour recalls; SoFAAS = energy from solid fat, alcohol, and added sugar.

**Table S4: Descriptive scoring criteria of the usual intake and the first 24-hour recall of the Global Diet Quality Score (GDQS), GDQS Positive (GDQS +) and GDQS Negative (GDQS -) of 101 athletes with disabilities in Federal District/Brazil, 2018–2019**

| GDQS components             | Usual Intake/Rec1 | Median | IQR  | Minimum | Maximum | p     |
|-----------------------------|-------------------|--------|------|---------|---------|-------|
| Legumes                     | Usual Intake      | 2,68   | 1,00 | 1,17    | 3,21    | 0,001 |
|                             | Rec1              | 4,00   | 2,00 | 0,00    | 4,00    |       |
| Nuts and Seeds              | Usual Intake      | 0,00   | 0,92 | 0,00    | 3,05    |       |
|                             | Rec1              | 0,00   | 0,00 | 0,00    | 4,00    |       |
| Dark Green Leafy Vegetables | Usual Intake      | 0,53   | 0,90 | 0,04    | 2,74    |       |
|                             | Rec1              | 0,00   | 2,00 | 0,00    | 4,00    |       |
| Whole Grains                | Usual Intake      | 0,10   | 0,72 | 0,07    | 1,41    |       |
|                             | Rec1              | 0,00   | 2,00 | 0,00    | 2,00    |       |
| Liquid Oils                 | Usual Intake      | 1,51   | 0,28 | 0,93    | 1,62    | 0,001 |
|                             | Rec1              | 2,00   | 0,00 | 0,00    | 2,00    |       |
| Fish                        | Usual Intake      | 0,04   | 0,02 | 0,02    | 0,54    | 0,001 |
|                             | Rec1              | 0,00   | 0,00 | 0,00    | 2,00    |       |
| Deep Orange Fruits          | Usual Intake      | 0,00   | 0,00 | 0,00    | 1,52    |       |
|                             | Rec1              | 0,00   | 0,00 | 0,00    | 2,00    |       |
| Citrus Fruits               | Usual Intake      | 0,03   | 0,01 | 0,01    | 0,50    | 0,001 |
|                             | Rec1              | 0,00   | 0,00 | 0,00    | 2,00    |       |
| Other Fruits                | Usual Intake      | 0,46   | 0,60 | 0,13    | 1,30    |       |
|                             | Rec1              | 0,00   | 1,00 | 0,00    | 2,00    |       |
| Low-fat Dairy               | Usual Intake      | 0,00   | 0,00 | 0,00    | 1,60    |       |
|                             | Rec1              | 0,00   | 0,00 | 0,00    | 2,00    |       |
| Poultry                     | Usual Intake      | 0,49   | 0,88 | 0,04    | 1,70    |       |
|                             | Rec1              | 0,00   | 2,00 | 0,00    | 2,00    |       |
| Eggs                        | Usual Intake      | 0,55   | 0,51 | 0,14    | 1,44    | 0,009 |
|                             | Rec1              | 1,00   | 2,00 | 0,00    | 2,00    |       |
| Cruciferous Vegetables      | Usual Intake      | 0,00   | 0,00 | 0,00    | 0,39    |       |
|                             | Rec1              | 0,00   | 0,00 | 0,00    | 0,50    |       |
| Deep Orange Vegetables      | Usual Intake      | 0,01   | 0,15 | 0,00    | 0,35    |       |
|                             | Rec1              | 0,00   | 0,25 | 0,00    | 0,50    |       |
| Deep Orange Tubers          | Usual Intake      | 0,00   | 0,00 | 0,00    | 0,43    |       |
|                             | Rec1              | 0,00   | 0,00 | 0,00    | 0,50    |       |
| Other Vegetables            | Usual Intake      | 0,13   | 0,15 | 0,03    | 0,36    | 0,001 |
|                             | Rec1              | 0,25   | 0,50 | 0,00    | 0,50    |       |
| High-fat Dairy              | Usual Intake      | 0,75   | 0,84 | 0,11    | 1,60    | 0,001 |
|                             | Rec1              | 1,00   | 2,00 | 0,00    | 2,00    |       |
| Red Meat                    | Usual Intake      | -      | -    | -       | -       | €     |
|                             | Rec1              | 0,00   | 0,00 | 0,00    | 1,00    |       |
| Juice                       | Usual Intake      | 1,49   | 0,84 | 0,35    | 1,92    |       |

|                                |              |       |      |      |       |       |
|--------------------------------|--------------|-------|------|------|-------|-------|
|                                | Rec1         | 2,00  | 2,00 | 0,00 | 2,00  |       |
| Processed Meat                 | Usual Intake | 1,55  | 0,54 | 0,51 | 1,85  |       |
|                                | Rec1         | 2,00  | 1,00 | 0,00 | 2,00  |       |
| White Roots and Tubers         | Usual Intake | 1,65  | 0,29 | 0,62 | 1,66  |       |
|                                | Rec1         | 2,00  | 1,00 | 0,00 | 2,00  |       |
| Refined Grains and Baked Goods | Usual Intake | 0,52  | 0,47 | 0,22 | 1,32  | 0,001 |
|                                | Rec1         | 0,00  | 0,00 | 0,00 | 2,00  |       |
| Sugar-sweetened Beverages      | Usual Intake | 1,99  | 0,51 | 0,28 | 1,99  | 0,004 |
|                                | Rec1         | 2,00  | 0,00 | 0,00 | 2,00  |       |
| Sweets and Ice Cream           | Usual Intake | 1,09  | 0,74 | 0,27 | 1,70  | 0,001 |
|                                | Rec1         | 1,00  | 2,00 | 0,00 | 2,00  |       |
| Fried Foods that are Purchased | Usual Intake | 1,97  | 0,00 | 1,97 | 2,00  | €     |
|                                | Rec1         | 2,00  | 0,00 | 2,00 | 2,00  |       |
| GDQS -                         | Usual Intake | 9,63  | 1,42 | 7,20 | 12,31 |       |
|                                | Rec1         | 10,00 | 4,00 | 2,00 | 15,00 |       |
| GDQS +                         | Usual Intake | 11,17 | 3,09 | 5,77 | 19,55 |       |
|                                | Rec1         | 10,25 | 5,50 | 0,00 | 23,25 | 0,001 |

SD = Standard Deviation; Rec1 = First 24-hour recall; Usual Intake = Calculation of usual intake with software MSM with all 24-hour recalls; € = Not possible to apply the Wilcoxon teste because the distribution asymmetry.

**Table S5: Socio-demographics and sport related support presented as number and the sum of rank from 101 athletes with disabilities from 13 Paralympic sports stratified by the Global Diet Quality Score (GDQS) according to the usual intake or the first 24-hour recall (Rec1) - Federal District/Brazil, 2018–2019**

| Characteristics     | Rec1 / Usual | Groups                           | n  | Rank    | p     |
|---------------------|--------------|----------------------------------|----|---------|-------|
| Sex                 | Usual        | Men                              | 82 | 4090,00 | 0,42  |
|                     |              | Women                            | 19 | 1061,00 |       |
|                     | Rec1         | Men                              | 82 | 4077,50 | 0,36  |
|                     |              | Women                            | 19 | 1073,50 |       |
| Sport               | Usual        | Individual                       | 45 | 2431,00 | 0,35  |
|                     |              | Team                             | 56 | 2720,00 |       |
|                     | Rec1         | Individual                       | 45 | 2552,50 | 0,08  |
|                     |              | Team                             | 56 | 2598,50 |       |
| Age                 | Usual        | 18-30y                           | 37 | 1723,00 | 0,25  |
|                     |              | 30y+                             | 64 | 3428,00 |       |
|                     | Rec1         | 18-30y                           | 37 | 1627,00 | 0,07  |
|                     |              | 30y+                             | 64 | 3524,00 |       |
| Income              | Usual        | Low                              | 67 | 3430,00 | 0,93  |
|                     |              | High                             | 34 | 1721,00 |       |
|                     | Rec1         | Low                              | 67 | 3377,50 | 0,78  |
|                     |              | High                             | 34 | 1773,50 |       |
| Sports scholarship  | Usual        | No                               | 55 | 2618,00 | 0,20  |
|                     |              | Yes                              | 46 | 2533,00 |       |
|                     | Rec1         | No                               | 55 | 2738,50 | 0,65  |
|                     |              | Yes                              | 46 | 2412,50 |       |
| Nutritional support | Usual        | No                               | 70 | 1814,00 | 0,09  |
|                     |              | Yes                              | 31 | 3337,00 |       |
|                     | Rec1         | No                               | 70 | 2051,50 | 0,00  |
|                     |              | Yes                              | 31 | 3099,50 |       |
| Education           | Usual†       | Primary education                | 24 | -       |       |
|                     |              | Secondary education              | 43 | -       |       |
|                     |              | Tertiary education or equivalent | 34 | -       |       |
|                     | Rec1         | Primary education                | 24 | 55,42   | 0,02* |
|                     |              | Secondary education              | 43 | 41,58   |       |
|                     |              | Tertiary education or equivalent | 34 | 59,79   |       |
| Ranking Level       | Usual        | International                    | 23 | 1258,00 | 0,49  |
|                     |              | Regional / National              | 78 | 3893,00 |       |
|                     | Rec1         | International                    | 23 | 1305,50 | 0,28  |
|                     |              | Regional / National              | 78 | 3845,50 |       |

\* p adj. - The difference was “tertiary education or equivalent” had a higher score than to “secondary education” from Kruskal–Wallis test followed by the Bonferroni-Dunn post hoc. All remaining analysis with Mann Whitney Test. † Kruskal–Wallis test did not converge.

**Table S6: Socio-demographics and sport related support presented as number and the sum of rank from 101 athletes with disabilities from 13 Paralympic sports stratified by the Brazilian Healthy Eating Index Revised (BHEI-R) according to the usual intake or the first 24-hour recall (Rec1) - Federal District/Brazil, 2018–2019**

| Characteristics     | Rec1 / Usual | Groups                           | n  | Rank    | p    |
|---------------------|--------------|----------------------------------|----|---------|------|
| Sex                 | Usual        | Men                              | 82 | 4133,00 | 0,67 |
|                     |              | Women                            | 19 | 1018,00 |      |
|                     | Rec1         | Men                              | 82 | 4071,00 | 0,33 |
|                     |              | Women                            | 19 | 1080,00 |      |
| Sport               | Usual        | Individual                       | 45 | 2545,00 | 0,09 |
|                     |              | Team                             | 56 | 2606,00 |      |
|                     | Rec1         | Individual                       | 45 | 2631,00 | 0,02 |
|                     |              | Team                             | 56 | 2520,00 |      |
| Age                 | Usual        | 18-30y                           | 37 | 1763,00 | 0,38 |
|                     |              | 30y+                             | 64 | 3388,00 |      |
|                     | Rec1         | 18-30y                           | 37 | 1973,00 | 0,54 |
|                     |              | 30y+                             | 64 | 3178,00 |      |
| Income              | Usual        | Low                              | 67 | 3402,00 | 0,91 |
|                     |              | High                             | 34 | 1749,00 |      |
|                     | Rec1         | Low                              | 67 | 3417,00 | 1,00 |
|                     |              | High                             | 34 | 1734,00 |      |
| Sports scholarship  | Usual        | No                               | 55 | 2577,00 | 0,12 |
|                     |              | Yes                              | 46 | 2574,00 |      |
|                     | Rec1         | No                               | 55 | 2647,00 | 0,28 |
|                     |              | Yes                              | 46 | 2504,00 |      |
| Nutritional support | Usual        | No                               | 70 | 1920,00 | 0,01 |
|                     |              | Yes                              | 31 | 3231,00 |      |
|                     | Rec1         | No                               | 70 | 1875,00 | 0,03 |
|                     |              | Yes                              | 31 | 3276,00 |      |
| Education†          | Usual        | Primary education                | 24 | -       |      |
|                     |              | Secondary education              | 43 | -       |      |
|                     |              | Tertiary education or equivalent | 34 | -       |      |
|                     | Rec1         | Primary education                | 24 | -       |      |
|                     |              | Secondary education              | 43 | -       |      |
|                     |              | Tertiary education or equivalent | 34 | -       |      |
| Ranking Level       | Usual        | International                    | 23 | 1342,00 | 0,17 |
|                     |              | Regional / National              | 78 | 3809,00 |      |
|                     | Rec1         | International                    | 23 | 1254,00 | 0,51 |
|                     |              | Regional / National              | 78 | 3897,00 |      |

Mann Whitney Test was used. † Kruskal–Wallis test did not converge.
